# Supplementary material for: Stretchable, transparent and molecular permeable honeycomb electrodes and their hydrogel hybrids prepared by the breath figure method and sputtering of metals
Source: Royal Society of Chemistry journal article supplement (doi:10.1039/c5ra18063e), 2015-01-01
Supplement: c5ra18063e1.pdf [file c5ra18063e1.pdf]

Electronic Supplementary Information

**Stretchable, Transparent and Molecular Permeable Honeycomb Electrodes and Their Hydrogel Hybrids Prepared by Breath Figure Method and Sputtering of Metals**

Hiroshi Yabu<sup>†\*</sup>, Kuniaki Nagamine<sup>‡</sup>, Jun Kamei<sup>†</sup>, Yuta Saito<sup>†</sup>, Shun Chihara<sup>‡</sup>, Tatsuaki Shimazaki<sup>‡</sup> and Matsuhiko Nishizawa<sup>†\*</sup>

<sup>†</sup> Institute of Multidisciplinary Research for Advanced Materials (IMRAM), Tohoku University, 2-1-1, Katahira, Aoba-Ku, Sendai 980-8577, Japan

<sup>‡</sup> Department of Bioengineering and Robotics, Tohoku University, 6-6-1, Aoba, Sendai 980-8579, Japan

**Appendix**

|                                                                                  |   |
|----------------------------------------------------------------------------------|---|
| S-1. Experimental set up of resistance measurement.....                          | 2 |
| S-2. SEM images of Ti and Pt coated honeycomb electrodes.....                    | 3 |
| S-3. Sputtering rate of Au thin films.....                                       | 3 |
| S-4. EDX spectrum and mapping images of cross-sectional honeycomb electrodes.... | 4 |
| S-5. Stress-strain curve of Au sputtered PB honeycomb films.....                 | 5 |
| S-6. Cross-sectional TEM images of Au thin films.....                            | 6 |
| S-7. Ink permeation experiment video                                             |   |

## S-1. Experimental set up of resistance measurement

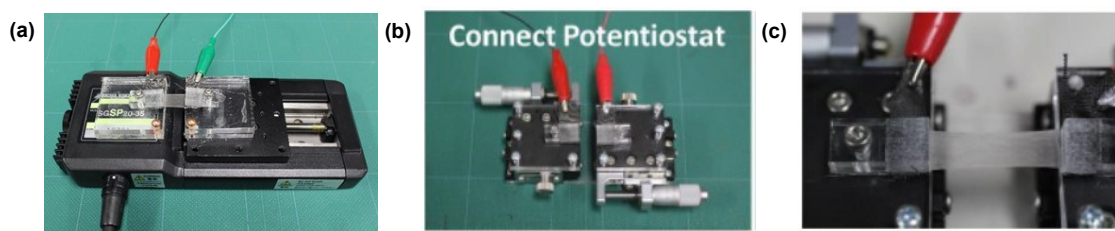

Figure S-1. Photographs of experimental set up of tensile test (a), and mobile stages for fixing honeycomb electrodes (b) and (c).

### *Experiments*

Two end of a honeycomb electrode fixed on a PDMS sheet was clamped on mobile stages of hand made tensile test equipment (SGSP-20-35, GSC-01, SIGMA Koki, Co. Ltd., Japan), and stretched unidirectionally. Current values were simultaneously measured with applying 1 V onto the stretching electrodes by using a potentiostat and calculated resistance change by using Ohm's law ( $R=V/I$ , where R, V and I are resistance, voltage and current values, respectively).

To evaluate the stability of honeycomb electrodes, resistance changes of honeycomb electrodes were also measured with applying repeated 30~50 % strains.

## S-2. SEM images of Ti and Pt coated honeycomb electrodes

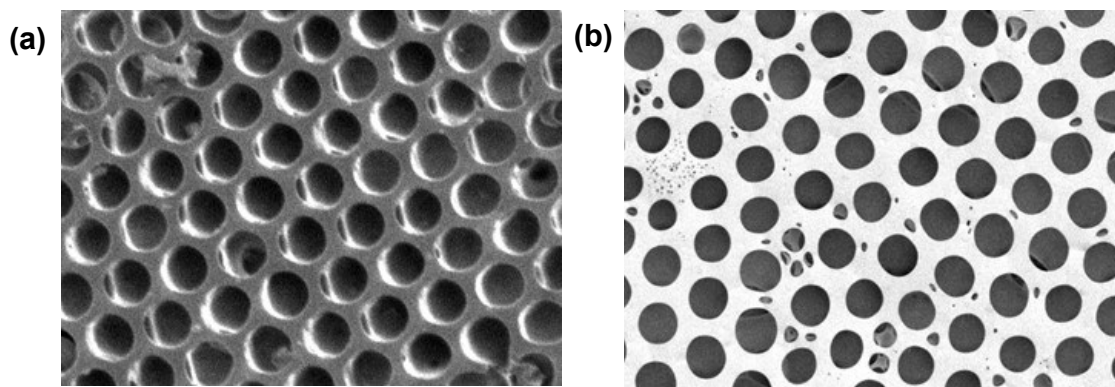

Figure S-2. SEM images of honeycomb electrodes coated with Ti (a) and Pt (b), respectively.

## S-3. Sputtering rate of Au thin films

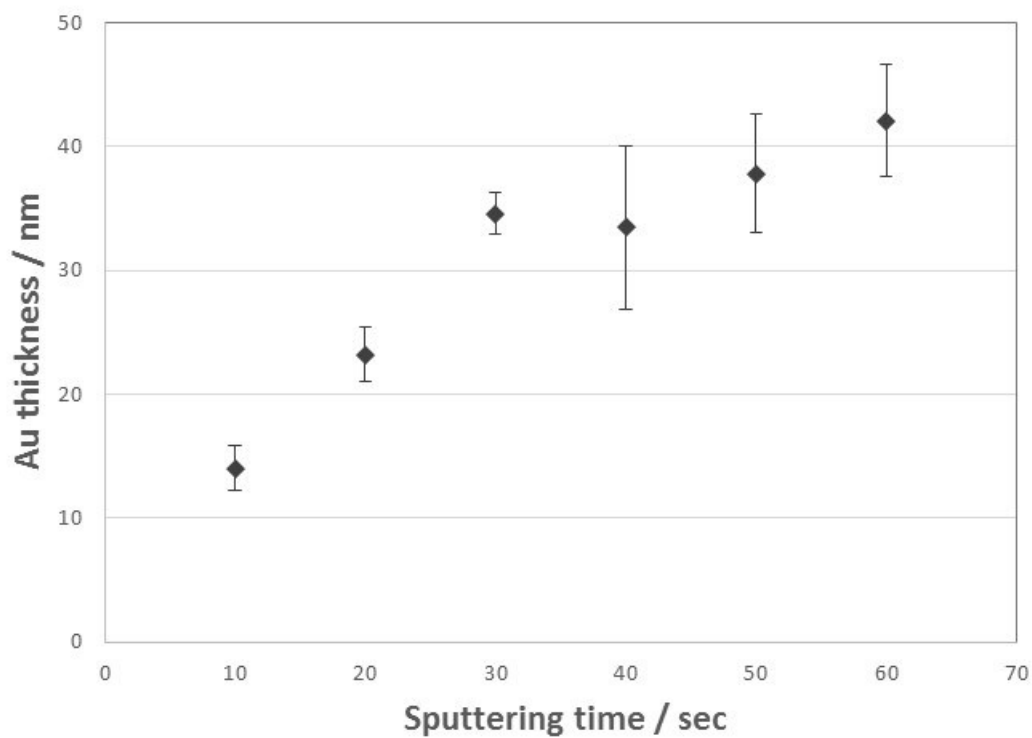

Figure S-3. Relation between sputtering time and Au thicknesses.

## S-4. EDX spectrum and mapping images of cross-sectional honeycomb electrodes

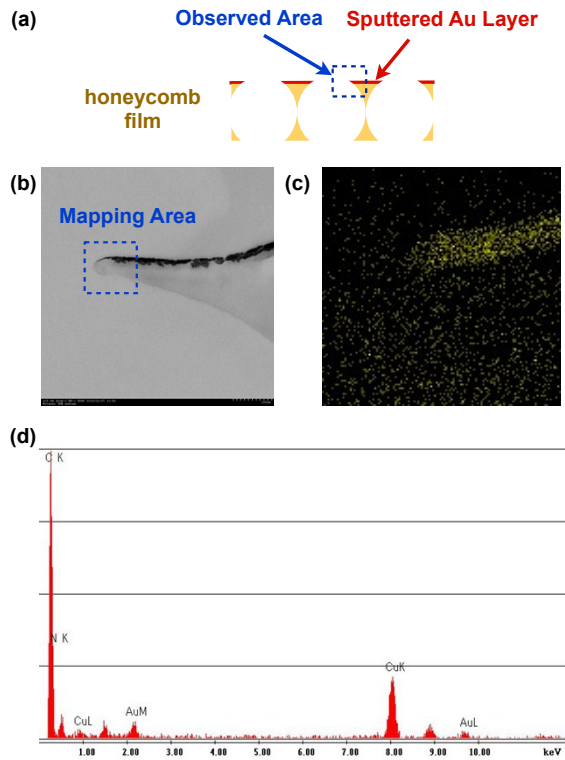

Figure S-4. Schematic illustration of cross-sectional model of honeycomb electrode (a), cross-sectional TEM image of honeycomb electrode (b), EDX mapping image of AuM signals (c) and EDX spectrum obtained from the same sample (d), respectively.

#### S-5. Stress-strain curve of Au sputtered PB honeycomb films

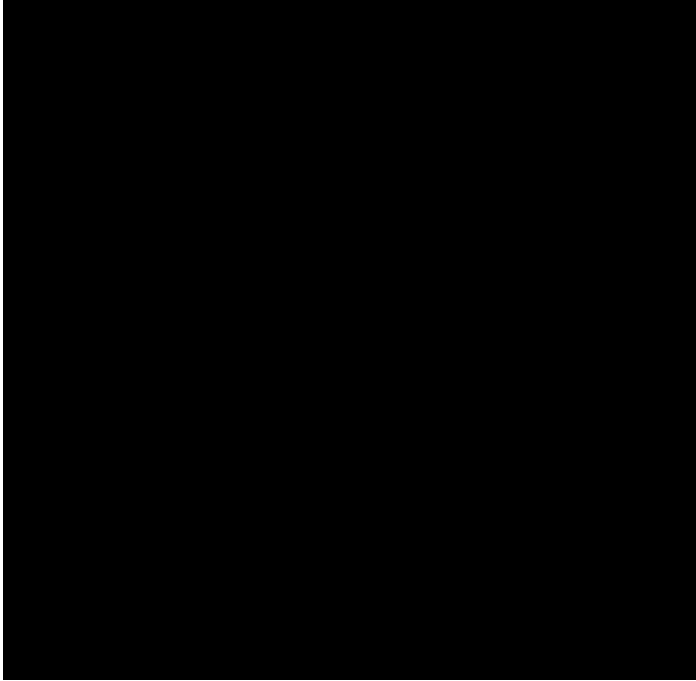

### *Experiments*

Au was sputtered for 30 s onto a PB honeycomb film. Both end of a strip spacemen of the Au sputtered PB honeycomb was fixed on chucks (DP-20, IMADA, Toyohashi), and then the sample spacemen was stretched at its velocity of 10 mm/sec. The stress and strain curve was recorded automatically.

### **S-6. Cross-sectional TEM images of Au thin films**

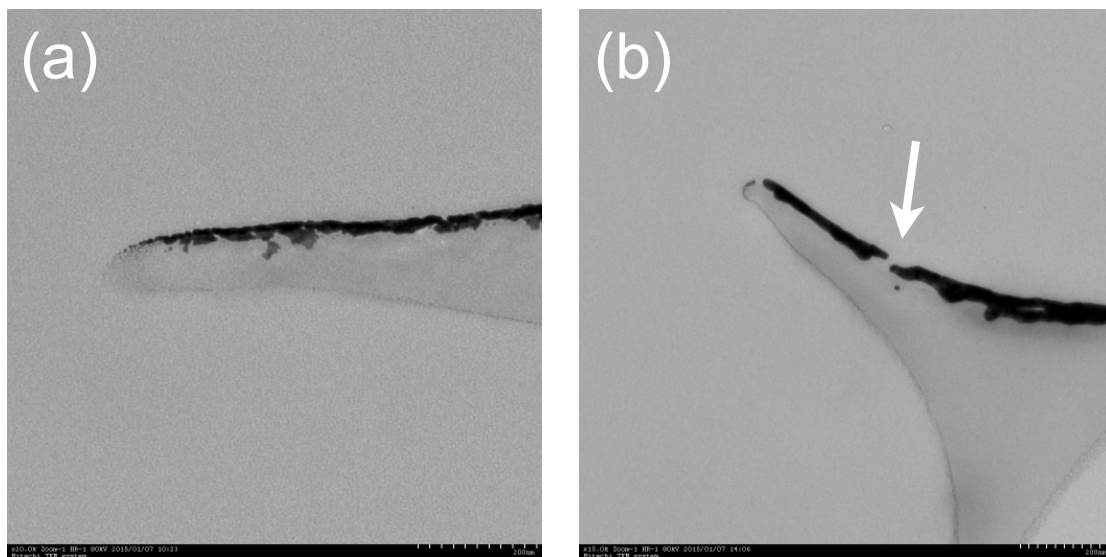

Figure S-5. Cross-sectional TEM images of honeycomb electrodes prepared by 20 sec sputtering (a) and 40 sec sputtering (b), respectively. A clack of Au thin film was observed in the case of 40 sec sputtering sample (white arrow).
